# Supplementary material
Source: HighWire-hosted journal article supplement (https://militaryhealth.bmj.com/content/171/2/120)
Supplement: inline-supplementary-material-1 [file inline-supplementary-material-1.pdf]

**Supplementary Table 1: Comparison of physical health comorbidities, functional outcomes, and functional levels between different amputation levels.**

| Physical health comorbidities, functional outcomes, and functional levels | Transfemoral (n=7) | Transtibial (n=78) |
|---------------------------------------------------------------------------|--------------------|--------------------|
| Physical health comorbidities (%)                                         |                    |                    |
| Phantom limb pain                                                         | 71.4               | 78.2               |
| Diabetes                                                                  | 42.8               | 33.3               |
| Hypertension                                                              | 14.3               | 23.1               |
| Knee osteoarthritis                                                       | 57.1               | 15.4               |
| Knee pain                                                                 | 42.8               | 17.9               |
| Back pain                                                                 | 71.4               | 69.2               |
| Functional outcomes (Mean (SD))                                           |                    |                    |
| Functional mobility (2MWT)                                                | 94.3 (6.8)         | 115.4 (14.1)       |
| Risk of falling (TUG test)*                                               | 14.3 (2.9)         | 10.3 (1.3)         |
| Functional levels (%)*                                                    |                    |                    |
| K1 and K2                                                                 | 42.8               | 2.3                |
| K3                                                                        | 57.1               | 73.1               |
| K4                                                                        | 0                  | 24.6               |

2MWT, 2-minute walk test; TUG, timed-up-and-go.

\* indicates significant difference in outcomes between transfemoral and transtibial at p<0.05 level
